# Supplementary material for: Comparative evaluation of routine coagulation testing on Stago sthemO 301 and Werfen ACL TOP 750
Source: publisher site journal article supplement (doi:10.1515/dx-2025-0018), 2025-03-31
Supplement: Supplementary file 1 [file j_dx-2025-0018_suppl_001.docx]

**Supplementary Table 1.** Description of the reagents used in this study.

| **Test** | **Stago SthemO** | **Werfen ACL TOP 750** |
| --- | --- | --- |
| **PT** | Name:   - SthemO PT M   Formulation:   - Lyophilized thromboplastin prepared from rabbit brain extract - Solvent containing calcium.   Measuring range: 20-240 sec | Name:   - RecombiPlasTin 2G   Formulation:   - Lyophilized recombinant human tissue factor, synthetic phospholipids with stabilizers, preservative and buffer. - Aqueous solution of calcium chloride, polybrene and a preservative   Measuring range: 10-150 sec |
| **APTT** | Name:   - SthemO PTT A   Formulation:   - Reagent containing cephalin prepared from rabbit cerebral tissues and a particulate activator (silica) in a buffered medium, lyophilized.   Measuring range: 20-240 sec | Name:   - SynthASil   Formulation:   - Buffered synthetic phospholipid reagent containing a colloidal silica activator, stabilizers and a preservative - Aqueous solution of calcium chloride (0.020 Mol/L) and a preservative   Measuring range: 15-300 sec |
| **Fibrinogen** | Name:   - SthemO Fib M   Formulation:   - Titrated human calcic thrombin (approx. 100 NIH units/mL) containing a specific heparin inhibitor to allow the assay of fibrinogen in heparinized plasmas.   Measuring range: 0.4-12 g/L | Name:   - Q.F.A.: Thrombin (Bovine)   Formulation:   - Lyophilized bovine thrombin (approximately 100 UNIH/mL) containing buffer, an antiheparin agent and a preservative   Measuring range: 1.5-10 g/L |
| **D-dimer** | Name:   - SthemO DDi M   Formulation:   - Tris buffer containing an heterophilic antibody blocking agent (including rheumatoid factor). - Suspension of microlatex particles coated with two different mouse monoclonal anti-human D-dimer antibodies then stabilized (with bovine albumin).   Measuring range: 190-30,000 ng/mL (FEU) | Name:   - HemosIL D-Dimer HS 500   Formulation:   - Latex Reagent: suspension of polystyrene latex particles coated with the F(ab’)2 fragment of a mouse monoclonal antibody (MA-8D3) directed against D-Dimer containing bovine serum albumin, buffer, stabilizers and preservative - Reaction Buffer: Hepes buffer containing bovine serum albumin, stabilizers and preservative   Measuring range: 210-12,800 ng/mL (FEU) |
| **Antithrombin** | Name:   - SthemO AT L   Formulation:   - Approximately 11.3 nKat of bovine thrombin per mL after reconstitution, lyophilized. - Chromogenic substrate, EtM-SPro-Arg-pNA, AcOH, approx. 1.4 µmoles per mL after reconstitution, lyophilized. - Solvent containing heparin.   Measuring range: 9-200 % | Name:   - Liquid Antithrombin   Formulation:   - Chromogenic substrate S-2765, n-alpha-Z-D-Arg-Gly-Arg-pNA 2HCl (6 mg/vial), surfactant and buffer - Solution containing bovine Factor Xa (20 nkat/vial), heparin buffer, bovine serum albumin and preservatives   Measuring range: 10-150 % |

*PT, Prothrombin Time; APTT, Activated Partial Thromboplastin Time*
